# Supplementary material
Source: Springer Nature journal article supplement (https://www.springermedizin.de/resource/supplementary/12936_2005_148_MOESM4_ESM.pdf/9546996)

a.  
Pre-existing  
immunity

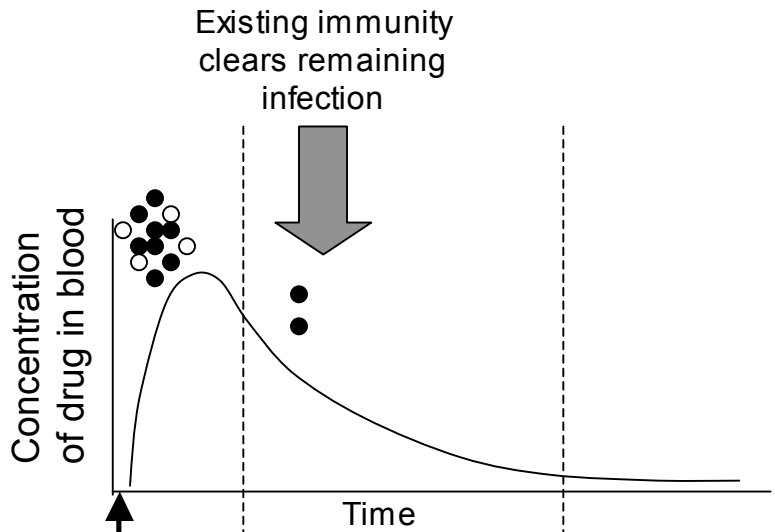

b.  
No  
pre-existing  
immunity

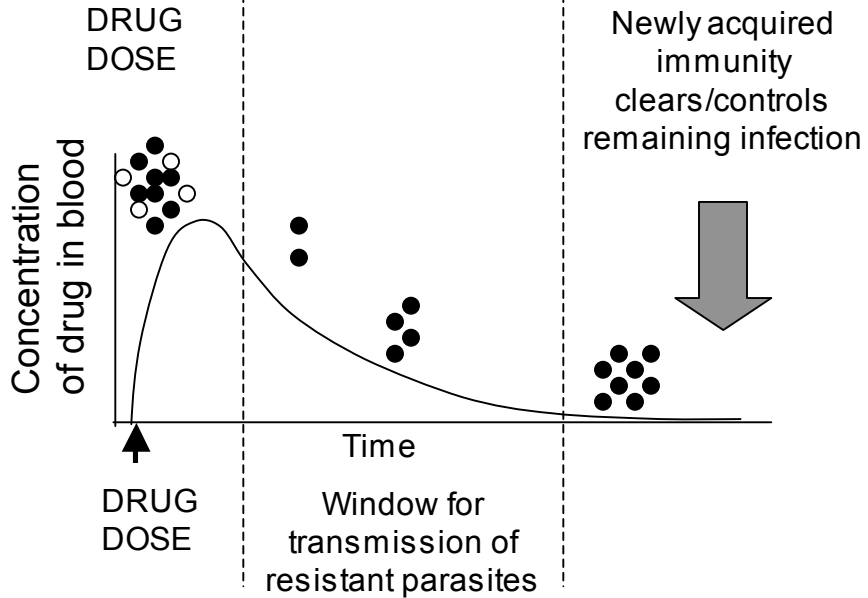

Supplement: MOESM4 [file 9546996]
